# Supplementary material for: Conformational Preferences of Pyridone Adenine Dinucleotides from Molecular Dynamics Simulations
Source: MDPI journal article supplement (doi:10.3390/ijms231911866), 2022-10-06
Supplement: s1 [file s1]

# SUPPLEMENTARY MATERIAL

## Conformational Preferences of Pyridone Adenine Dinucleotides from Molecular Dynamics Simulations

David P. Buckley<sup>1</sup>, Marie E. Migaud<sup>2,3</sup>, and John J. Tanner<sup>1,4,\*</sup>

<sup>1</sup>Department of Biochemistry, University of Missouri, Columbia, Missouri 65211, USA

<sup>2</sup>Department of Pharmacology, College of Medicine, University of South Alabama, Mobile, AL 36688, USA

<sup>3</sup>Mitchell Cancer Institute, College of Medicine, University of South Alabama, Mobile, AL 36604, USA

<sup>4</sup>Department of Chemistry, University of Missouri, Columbia, Missouri 65211, USA

### Table of Contents

|                                                                                                               |    |
|---------------------------------------------------------------------------------------------------------------|----|
| <b>Figure S1.</b> Time evolution of the inter-base centroid-centroid distance.                                | S2 |
| <b>Figure S2.</b> Individual centroid-centroid distance distribution for each 100-ns dinucleotide simulation. | S3 |
| <b>Figure S3.</b> Plot of the inter-base distance versus adenine glycosidic bond dihedral angle ( $\chi_A$ ). | S4 |
| <b>Figure S4.</b> Cluster representations of conformations of NAD <sup>+</sup> and NADH.                      | S5 |
| <b>Figure S5.</b> Selected conformations of NAD(H) and ox-NADs.                                               | S6 |
| <b>Figure S6.</b> Cluster representations of conformations ox-NADs.                                           | S7 |
| <b>Supplementary References</b>                                                                               | S8 |

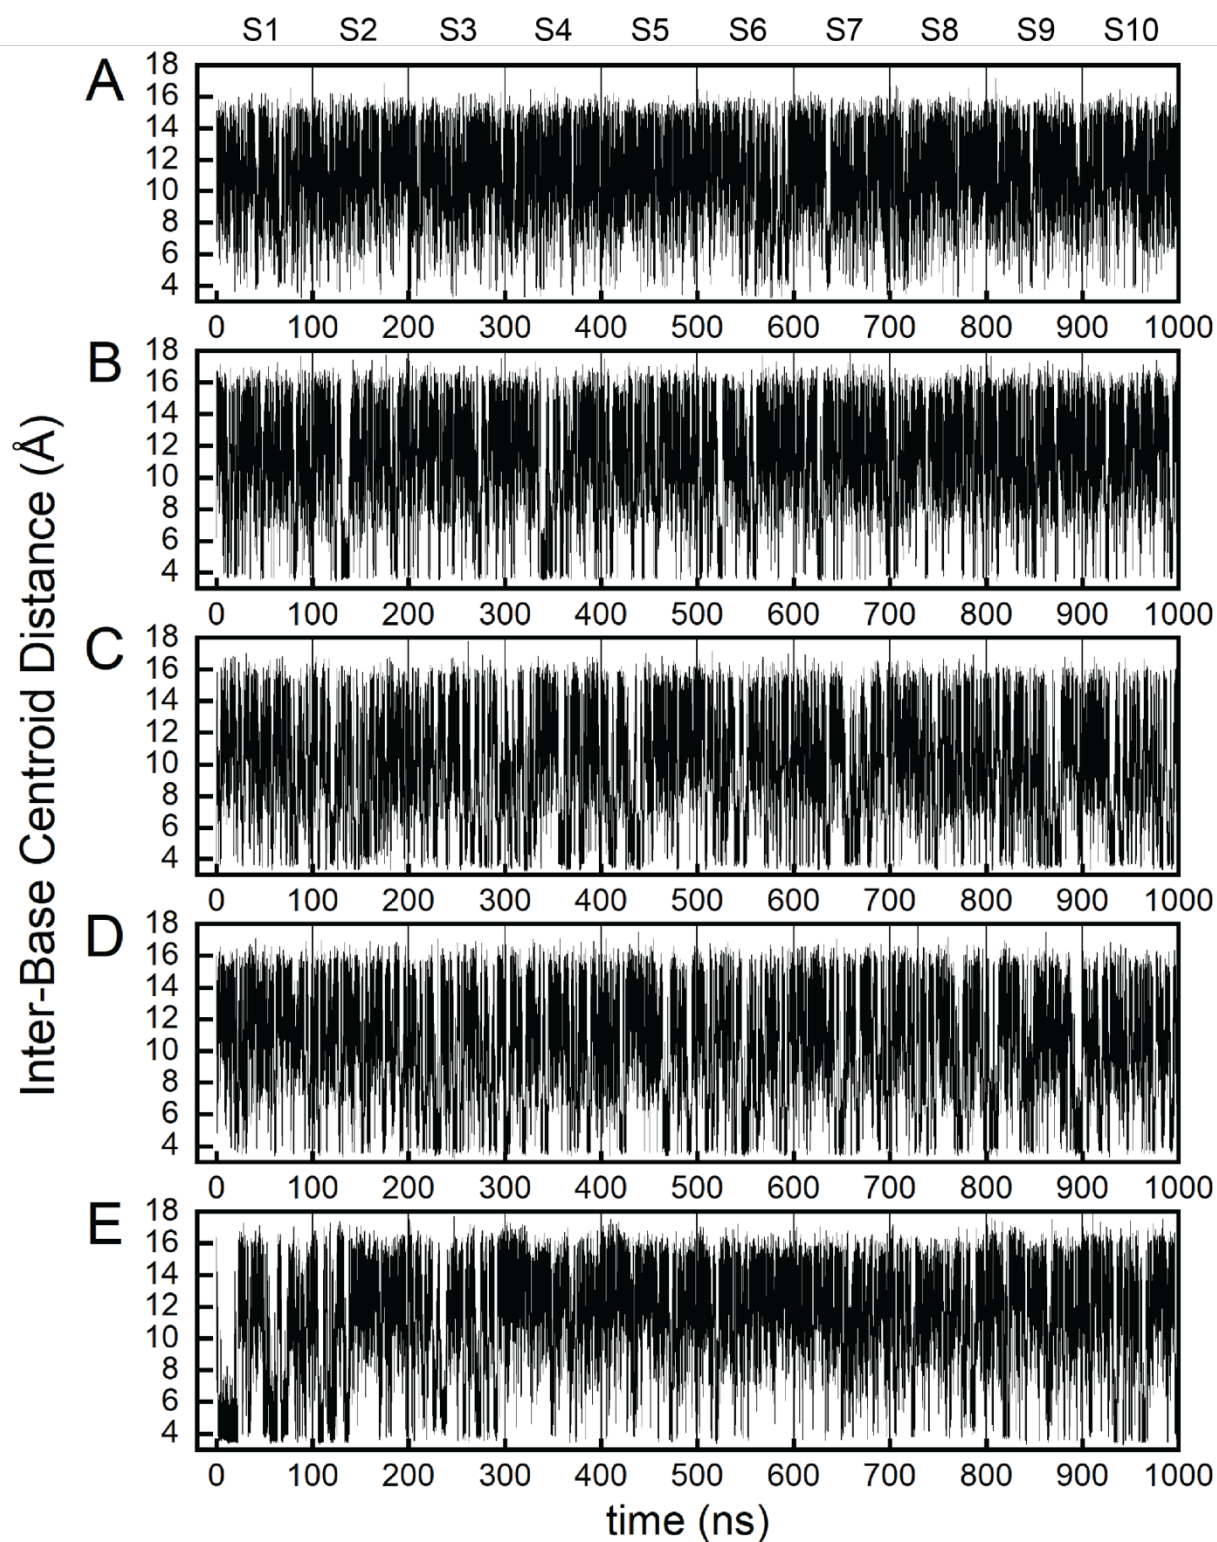

**Figure S1.** Time evolution of the inter-base centroid-centroid distance for ten 100-ns simulations (S1-S10, separated by vertical lines) of (A) NAD<sup>+</sup>, (B) NADH, (C) 2-ox-NAD, (D) 4-ox-NAD, and (E) 6-ox-NAD.

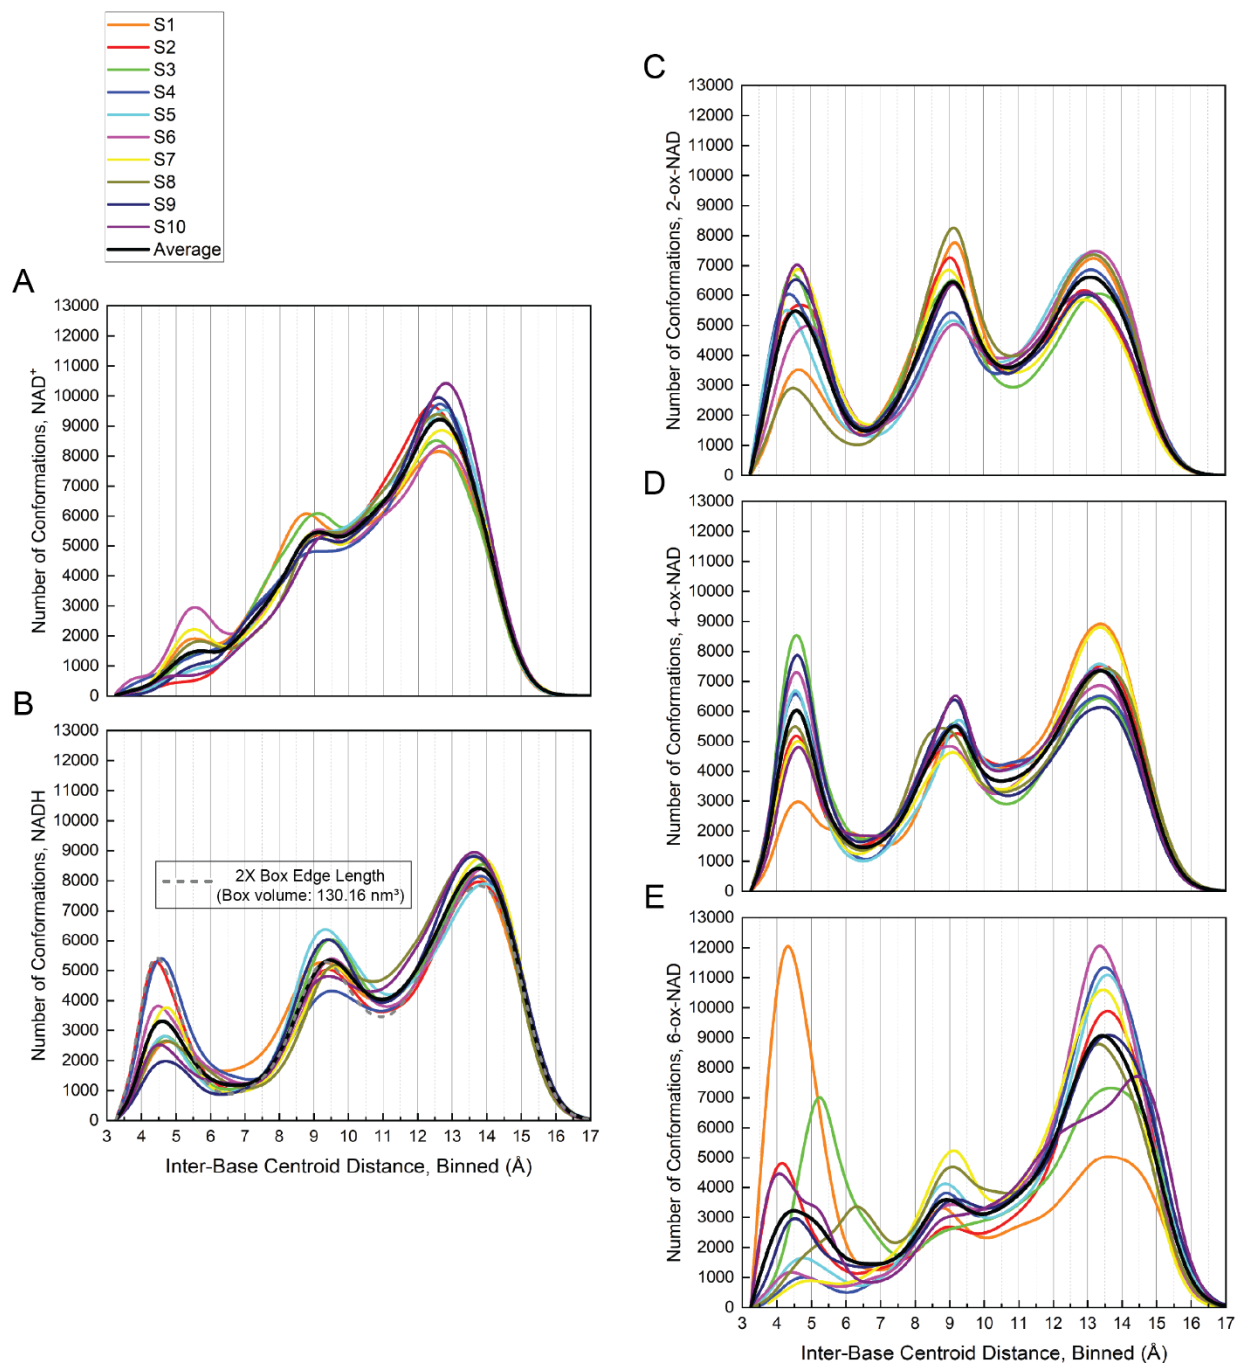

**Figure S2.** Individual distributions of the centroid-centroid distance between the bases from the ten individual 100-ns simulations (S1-S10) against their average (black) for (A) NAD<sup>+</sup>, (B) NADH, (C) 2-ox-NAD, (D) 4-ox-NAD, and (E) 6-ox-NAD. The dashed curve in panel B was calculated from a 100 ns simulation of NADH performed with the box volume increased from 130.16 nm<sup>3</sup> to

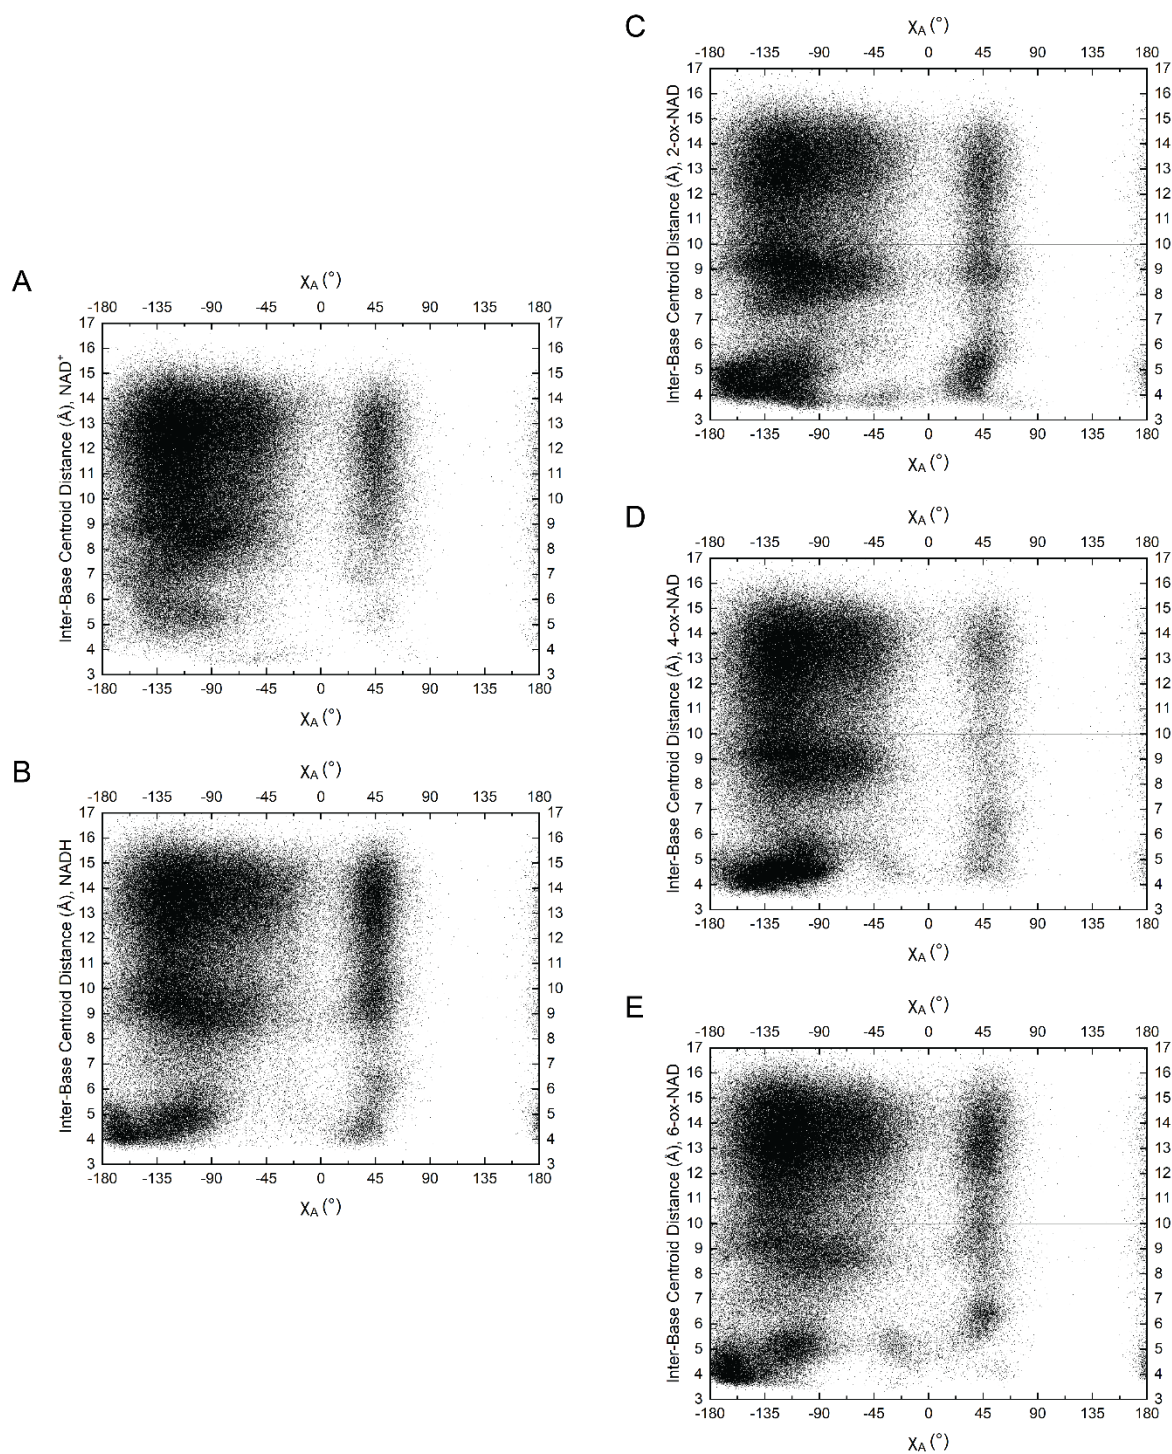

**Figure S3.** Scatter plot of the inter-base centroid-centroid distance versus adenosine glycosidic bond dihedral angle ( $\chi_A$ ) for (A) NAD<sup>+</sup>, (B) NADH, (C) 2-ox-NAD, (D) 4-ox-NAD, and (E) 6-ox-NAD.

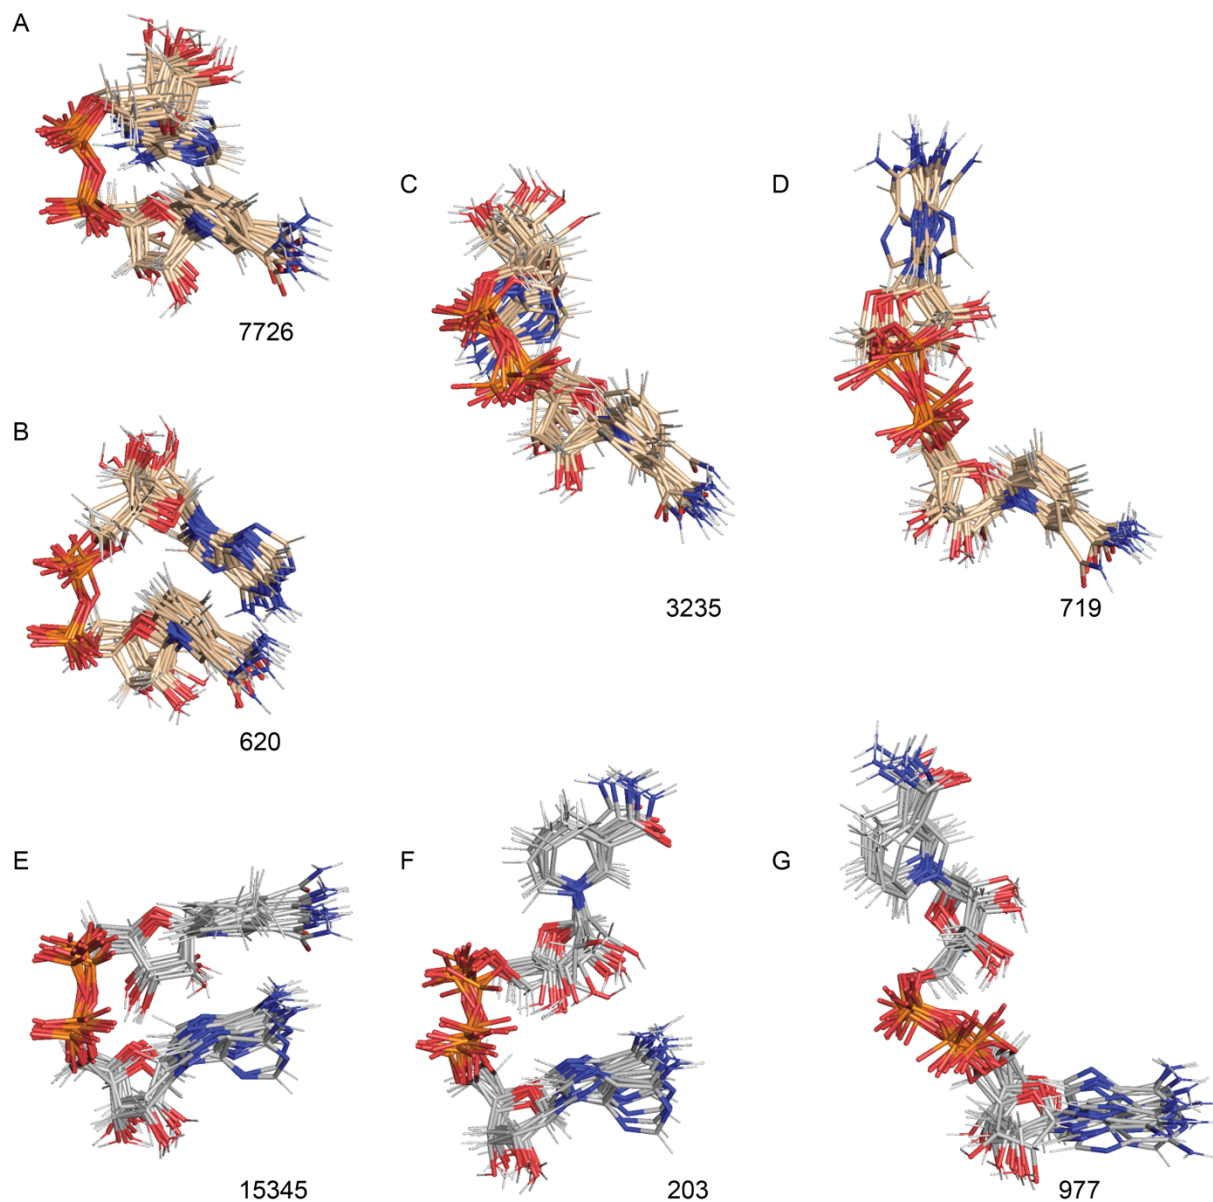

**Figure S4.** Clusters of conformations of NAD<sup>+</sup> (A-D) and NADH (E-G). Each panel shows 10 conformations selected from conformations within 1.0 Å RMSD of the conformations shown in Fig. 4. The numbers are the total counts of conformations that meet the 1 Å RMSD criterion.



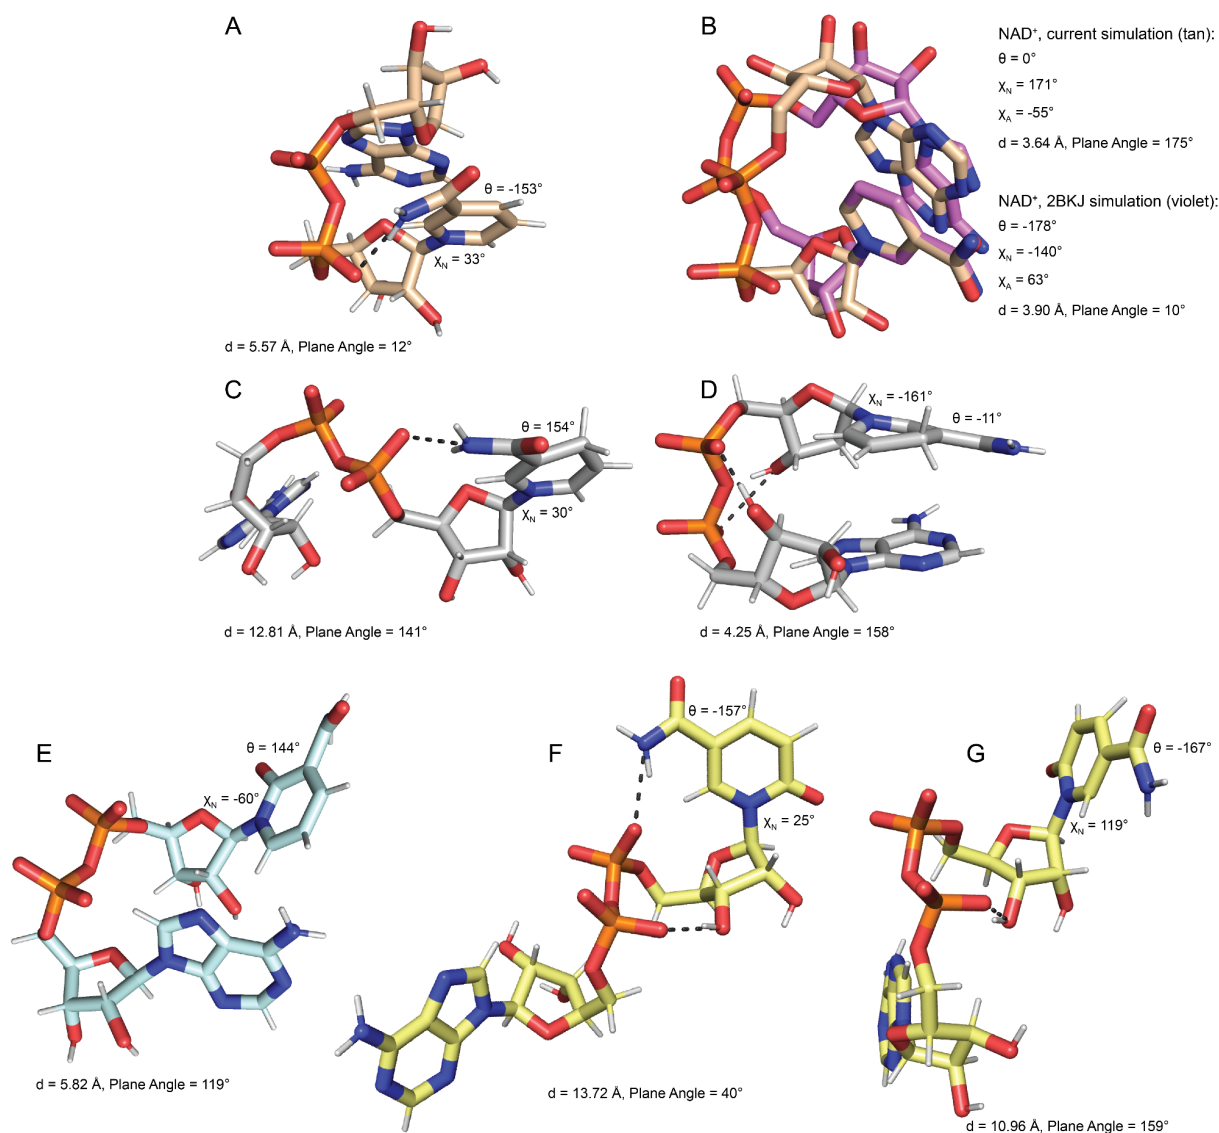

**Figure S5.** Selected conformations of NAD(H) and ox-NADs. (A) NAD<sup>+</sup> with the nicotinamide ribose *syn*. (B) Overlay of the rare NAD<sup>+</sup> folded conformation from the current simulation (tan) and the starting conformation from a previous simulation of NAD<sup>+</sup> (PDB 2BKJ, chain B, violet) [1]. (C) NADH with the nicotinamide ribose *syn*. (D) Folded NADH with inter-base plane angle near  $160^\circ$ . (E) High-*anti* pyridone ribose conformation of 2-ox-NAD. (F) 6-ox-NAD with the pyridone ribose *syn*. (G) High-*syn* pyridone ribose conformation of 6-ox-NAD. Values of the inter-base centroid distance ‘d’, plane angle,  $\theta$ , and  $\chi_N$  are indicated for each pose. Hydrogen bonds are indicated by dashed black lines between heavy atoms.

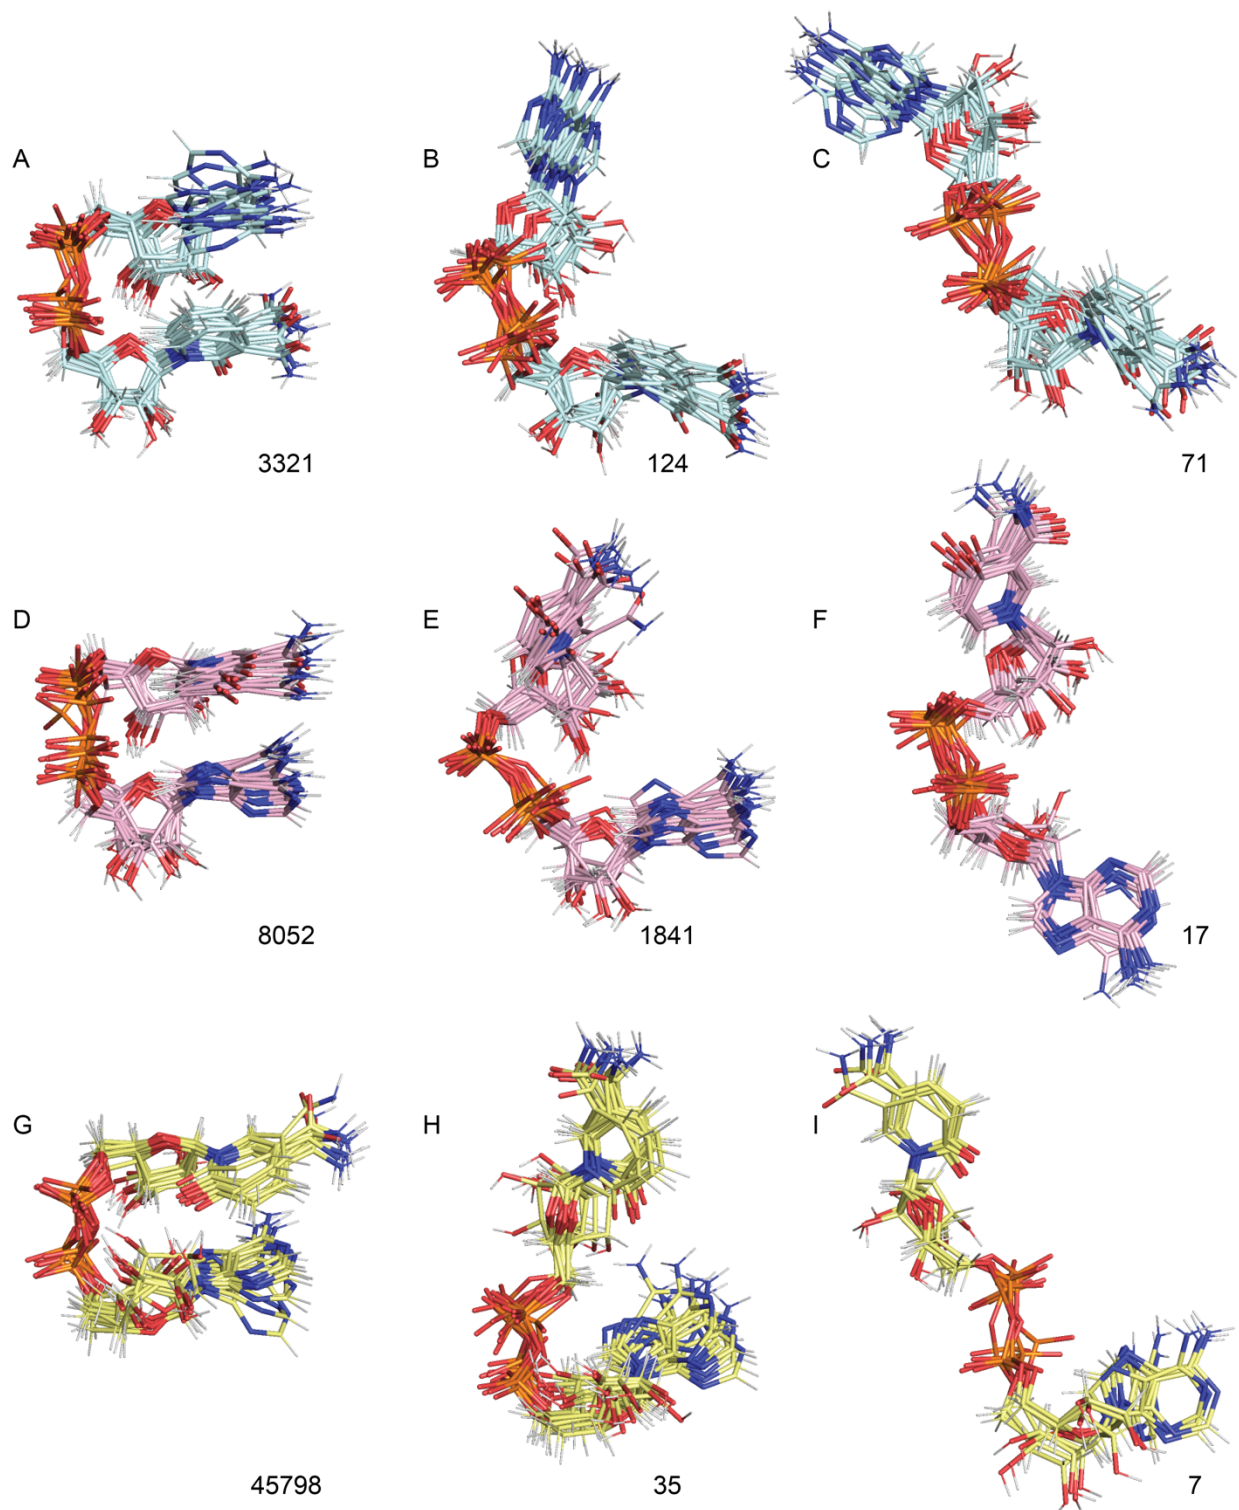

**Figure S6.** Clusters of conformations of 2-ox-NAD (A-C), 4-ox-NAD (D-F), and 6-ox-NAD (G-I). Each panel shows 10 conformations selected from conformations within 1.0 Å RMSD of the conformations shown in Fig. 6, except for panel I, which contains 7 poses in the cluster. The numbers are the total counts of conformations that meet the 1 Å RMSD criterion.

### Supplementary References

[1] P.E. Smith, J.J. Tanner, Molecular dynamics simulations of  $\text{NAD}^+$  in solution, J. Amer. Chem. Soc. 121(37) (1999) 8637-8644.
